# Supplementary material
Source: PubMed Central journal article supplement (PMC6289899)
Supplement: NIHMS974301-supplement-01.pdf [file NIHMS974301-supplement-01.pdf]

## APPENDIX MATERIAL

**Supplementary Table 1.** Univariable multinomial regression of sociodemographic and clinical parameters with healthy liver, steatosis, and liver fibrosis, adjusted for age and sex, Cameron County Hispanic Cohort

|                                    | Steatosis vs Healthy |                 | Fibrosis vs Healthy |                 | Fibrosis vs Steatosis |                 |
|------------------------------------|----------------------|-----------------|---------------------|-----------------|-----------------------|-----------------|
|                                    | OR (95% CI)          | <i>p</i> -value | OR (95% CI)         | <i>p</i> -value | OR (95% CI)           | <i>p</i> -value |
| Age (years)                        | 1.0 (0.8 - 1.3)      | 0.8145          | 0.8 (0.6 - 1.0)     | 0.0865          | 0.8 (0.6 - 1.0)       | 0.0694          |
| Male Sex                           | 0.9 (0.5 - 1.7)      | 0.7444          | 1.6 (0.8 - 3.5)     | 0.1970          | 1.8 (0.8 - 4.3)       | 0.1671          |
| Diabetes <sup>c</sup>              | 1.9 (0.9 - 4.0)      | 0.0750          | 1.9 (0.7 - 5.1)     | 0.1998          | 0.5 (0.3 - 1.1)       | 0.0750          |
| Fasting Glucose (10 mg/dL)         | 1.1 (1.0 - 1.2)      | 0.0131          | 1.1 (1.0 - 1.2)     | 0.2512          | 1.0 (0.9 - 1.1)       | 0.4920          |
| Hemoglobin A1c (%)                 | 1.2 (0.9 - 1.6)      | 0.3003          | 1.2 (0.9 - 1.5)     | 0.2615          | 1.0 (0.9 - 1.1)       | 0.9888          |
| Insulin (10 mg/dL)                 | 2.8 (1.6 - 4.8)      | 0.0001*         | 1.5 (0.7 - 2.9)     | 0.2749          | 0.5 (0.2 - 1.1)       | 0.1004          |
| HOMA-IR                            | 1.5 (1.2 - 1.7)      | <0.0001*        | 1.2 (0.9 - 1.5)     | 0.1983          | 0.8 (0.6 - 1.1)       | 0.1405          |
| Diastolic BP (mmHg) <sup>d</sup>   | 1.5 (1.1 - 2.0)      | 0.0172          | 1.1 (0.6 - 2.0)     | 0.8302          | 0.7 (0.4 - 1.4)       | 0.3163          |
| Hypertension <sup>e</sup>          | 1.1 (0.5 - 2.6)      | 0.7799          | 1.6 (0.6 - 4.8)     | 0.3772          | 1.4 (0.5 - 4.6)       | 0.5361          |
| Triglycerides (50 mg/dL)           | 1.5 (1.1 - 1.9)      | 0.0029*         | 1.2 (0.7 - 1.9)     | 0.5709          | 0.8 (0.5 - 1.3)       | 0.3575          |
| HDL Cholesterol 10 (mg/dL)         | 0.5 (0.4 - 0.7)      | 0.0001*         | 1.0 (0.6 - 1.5)     | 0.8665          | 1.8 (1.1 - 2.9)       | 0.0110          |
| AST (10 units/L)                   | 1.4 (1.1 - 1.9)      | 0.0208          | 1.5 (1.1 - 2.0)     | 0.0118          | 1.0 (0.9 - 1.2)       | 0.4262          |
| ALT (10 units/L)                   | 1.5 (1.2 - 1.9)      | 0.0003*         | 1.4 (1.1 - 1.8)     | 0.0050*         | 0.9 (0.8 - 1.1)       | 0.3408          |
| AST/ALT Ratio                      | 0.4 (0.0 - 3.4)      | 0.3766          | 3.2 (0.8 - 13.1)    | 0.0993          | 8.8 (0.7 - 106)       | 0.0858          |
| Obese <sup>f</sup>                 | 3.1 (1.7 - 5.6)      | 0.0001*         | 1.7 (0.8 - 3.9)     | 0.1816          | 0.6 (0.2 - 1.3)       | 0.1871          |
| Waist Circumference (10 cm)        | 1.0 (1.0 - 1.1)      | <0.0001*        | 1.0 (1.0 - 1.1)     | 0.2972          | 1.0 (0.9 - 1.0)       | 0.1389          |
| Platelets (50×10 <sup>3</sup> /μL) | 1.1 (0.8 - 1.4)      | 0.5610          | 0.8 (0.5 - 1.2)     | 0.2567          | 0.7 (0.5 - 1.1)       | 0.1171          |
| Anti-HCV                           | 8.4 (0.9 - 81.5)     | 0.0676          | 19.4 (2.1 - 181.4)  | 0.0094          | 2.3 (0.5 - 11.9)      | 0.3139          |
| Drinks per week                    | 1.0 (0.9 - 1.1)      | 0.6097          | 1.1 (1.0 - 1.2)     | 0.1163          | 1.0 (1.0 - 1.1)       | 0.2225          |
| Heavy Drinking <sup>g</sup>        | 0.8 (0.1 - 8.4)      | 0.7726          | 3.8 (0.3 - 45.1)    | 0.4104          | 4.8 (0.6 - 41.2)      | 0.1542          |

**Abbreviations:** OR, Odds Ratio; CI, confidence interval; HOMA-IR, homeostasis model of insulin resistance ; BP, blood pressure; LDL, low-density lipoprotein; HDL, high-density lipoprotein; AST, aspartate aminotransferase; ALT, alanine aminotransferase

**Note.** Statistical tests significant at the 5% level after correction for false discovery rate are marked with an asterisk.

<sup>a</sup> Healthy indicates no evidence of steatosis and liver stiffness  $\leq 1.34$ ; steatosis indicates evidence of steatosis and liver stiffness  $\leq 1.34$  m/s; fibrosis indicates liver stiffness  $> 1.34$  m/s

<sup>b</sup> OR, 95% CI and *P*-value obtained from survey-based multinomial logistic regression

<sup>c</sup> According to American Diabetes 2010 Diagnostic Guidelines

<sup>d</sup> Blood pressure analyses are adjusted for self-reported use of antihypertensive medication

<sup>e</sup> Systolic Blood Pressure  $> 135$  or Diastolic Blood Pressure  $> 85$  or taking antihypertensive medication

<sup>f</sup> Body Mass Index  $\geq 30$  kg/m<sup>2</sup>

<sup>g</sup> For men, greater than 21 self-reported drinks per week; for women, greater than 14 drinks per week.

**Supplementary Table 2.** Univariable multinomial regression of sociodemographic and clinical parameters with healthy liver, steatosis, and liver fibrosis, excluding participants with viral hepatitis and self-reported heavy alcohol consumption, Cameron County Hispanic Cohort

|                                    | Steatosis vs Healthy <sup>a</sup> |         | Fibrosis vs Healthy |         | Fibrosis vs Steatosis |         |
|------------------------------------|-----------------------------------|---------|---------------------|---------|-----------------------|---------|
|                                    | OR (95% CI) <sup>b</sup>          | p-value | OR (95% CI)         | p-value | OR (95% CI)           | p-value |
| Age (years)                        | 1.1 (0.9 - 1.3)                   | 0.4712  | 0.8 (0.6 - 1.0)     | 0.0791  | 0.7 (0.5 - 1.0)       | 0.0268  |
| Male Sex                           | 0.8 (0.4 - 1.7)                   | 0.6386  | 1.3 (0.6 - 3.1)     | 0.5313  | 1.6 (0.6 - 4.2)       | 0.3794  |
| Diabetes <sup>c</sup>              | 2.1 (1.0 - 4.3)                   | 0.0397  | 1.5 (0.5 - 4.3)     | 0.4694  | 0.7 (0.3 - 1.9)       | 0.4809  |
| Fasting Glucose (10 mg/dL)         | 1.1 (1.0 - 1.2)                   | 0.0161  | 1.0 (0.9 - 1.2)     | 0.5309  | 1.0 (0.8 - 1.1)       | 0.5050  |
| Hemoglobin A1c (%)                 | 1.2 (0.9 - 1.6)                   | 0.3267  | 1.1 (0.8 - 1.5)     | 0.4267  | 1.0 (0.8 - 1.2)       | 0.7430  |
| Insulin (10 mg/dL)                 | 2.6 (1.5 - 4.4)                   | 0.0008* | 1.5 (0.7 - 3.1)     | 0.3018  | 0.6 (0.2 - 1.4)       | 0.2267  |
| HOMA-IR                            | 1.4 (1.2 - 1.7)                   | 0.0001* | 1.1 (0.9 - 1.5)     | 0.3570  | 0.8 (0.6 - 1.1)       | 0.2098  |
| Diastolic BP (mmHg) <sup>d</sup>   | 1.5 (1.0 - 2.1)                   | 0.0361  | 1.2 (0.6 - 2.4)     | 0.6225  | 0.8 (0.4 - 1.6)       | 0.5194  |
| Hypertension <sup>e</sup>          | 1.2 (0.5 - 2.5)                   | 0.7237  | 1.1 (0.4 - 3.1)     | 0.8024  | 1.0 (0.3 - 3.0)       | 0.9778  |
| Triglycerides (50 mg/dL)           | 1.5 (1.1 - 1.9)                   | 0.0033* | 1.2 (0.7 - 2.1)     | 0.5440  | 0.8 (0.4 - 1.5)       | 0.5090  |
| HDL Cholesterol 10 (mg/dL)         | 0.6 (0.4 - 0.8)                   | 0.0017* | 0.9 (0.6 - 1.4)     | 0.5613  | 1.4 (0.9 - 2.3)       | 0.1144  |
| AST (10 units/L)                   | 1.4 (1.0 - 1.9)                   | 0.0483  | 1.5 (1.1 - 2.2)     | 0.0193  | 1.1 (1.0 - 1.2)       | 0.1268  |
| ALT (10 units/L)                   | 1.5 (1.1 - 1.9)                   | 0.0028* | 1.5 (1.1 - 1.9)     | 0.0021* | 1.0 (0.9 - 1.2)       | 0.9911  |
| AST/ALT Ratio                      | 0.5 (0.1 - 4.6)                   | 0.5275  | 2.9 (0.8 - 10.3)    | 0.1016  | 6.0 (0.5 - 76.7)      | 0.1683  |
| Obese <sup>f</sup>                 | 2.6 (1.4 - 4.7)                   | 0.0022* | 1.5 (0.6 - 3.7)     | 0.4199  | 0.6 (0.2 - 1.2)       | 0.2628  |
| Waist Circumference (10 cm)        | 1.5 (1.2 - 1.9)                   | 0.0008* | 1.1 (0.7 - 1.6)     | 0.8143  | 0.7 (0.4 - 1.1)       | 0.1386  |
| Platelets (50x10 <sup>3</sup> /μL) | 1.1 (0.9 - 1.5)                   | 0.3005  | 0.7 (0.5 - 1.1)     | 0.1417  | 0.6 (0.4 - 1.0)       | 0.0300  |
| Anti-HCV                           | -                                 | -       | -                   | -       | -                     | -       |
| Drinks per week                    | 0.9 (0.8 - 1.1)                   | 0.4516  | 1.1 (1.0 - 1.3)     | 0.1476  | 1.2 (1.0 - 1.4)       | 0.0854  |
| Heavy Drinking <sup>g</sup>        | -                                 | -       | -                   | -       | -                     | -       |

**Abbreviations:** OR, Odds Ratio; CI, confidence interval; HOMA-IR, homeostasis model of insulin resistance; BP, blood pressure; LDL, low-density lipoprotein; HDL, high-density lipoprotein; AST, aspartate aminotransferase; ALT, alanine aminotransferase

**Note.** Statistical tests significant at the 5% level after correction for false discovery rate are marked with an asterisk.

<sup>a</sup> Healthy indicates no evidence of steatosis and liver stiffness  $\leq 1.34$ ; steatosis indicates evidence of steatosis and liver stiffness  $\leq 1.34$  m/s; fibrosis indicates liver stiffness  $> 1.34$  m/s

<sup>b</sup> OR, 95% CI and *P*-value obtained from survey-based multinomial logistic regression

<sup>c</sup> According to American Diabetes 2010 Diagnostic Guidelines

<sup>d</sup> Blood pressure analyses are adjusted for self-reported use of antihypertensive medication

<sup>e</sup> Systolic Blood Pressure  $> 135$  or Diastolic Blood Pressure  $> 85$  or taking antihypertensive medication

<sup>f</sup> Body Mass Index  $\geq 30$  kg/m<sup>2</sup>

<sup>g</sup> For men, greater than 21 self-reported drinks per week; for women, greater than 14 drinks per week.

**Supplementary Table 3.** Univariable multinomial regression of sociodemographic and clinical parameters with healthy liver, steatosis, and liver fibrosis, excluding F4 fibrosis, Cameron County Hispanic Cohort

|                                    | Steatosis vs Healthy |                 | Fibrosis vs Healthy |                 | Fibrosis vs Steatosis |                 |
|------------------------------------|----------------------|-----------------|---------------------|-----------------|-----------------------|-----------------|
|                                    | OR (95% CI)          | <i>p</i> -value | OR (95% CI)         | <i>p</i> -value | OR (95% CI)           | <i>p</i> -value |
| Age (years)                        | 1.0 (0.8 - 1.3)      | 0.7975          | 0.7 (0.6 - 1.0)     | 0.0425          | 0.7 (0.5 - 1.0)       | 0.0302          |
| Male Sex                           | 0.9 (0.5 - 1.7)      | 0.7313          | 2.0 (0.8 - 5.0)     | 0.1210          | 2.3 (0.8 - 6.2)       | 0.1046          |
| Diabetes <sup>c</sup>              | 1.9 (1.0 - 3.8)      | 0.0655          | 1.1 (0.4 - 3.4)     | 0.8606          | 0.6 (0.2 - 1.6)       | 0.2984          |
| Fasting Glucose (10 mg/dL)         | 1.1 (1.0 - 1.2)      | 0.0155          | 1.1 (0.9 - 1.2)     | 0.3289          | 1.0 (0.9 - 1.1)       | 0.6070          |
| Hemoglobin A1c (%)                 | 1.2 (0.9 - 1.5)      | 0.3107          | 1.1 (0.9 - 1.5)     | 0.3854          | 1.0 (0.8 - 1.1)       | 0.7832          |
| Insulin (10 mg/dL)                 | 2.7 (1.6 - 4.6)      | 0.0002*         | 1.3 (0.6 - 2.9)     | 0.4641          | 0.5 (0.2 - 1.2)       | 0.1305          |
| HOMA-IR                            | 1.4 (1.2 - 1.7)      | 0.0001*         | 1.1 (0.9 - 1.5)     | 0.3416          | 0.8 (0.6 - 1.1)       | 0.1686          |
| Diastolic BP (mmHg) <sup>d</sup>   | 1.4 (1.0 - 2.0)      | 0.0381          | 1.2 (0.5 - 2.6)     | 0.7028          | 0.8 (0.4 - 1.7)       | 0.5996          |
| Hypertension <sup>e</sup>          | 1.1 (0.5 - 2.4)      | 0.7585          | 0.9 (0.3 - 2.6)     | 0.9125          | 0.8 (0.3 - 2.5)       | 0.7556          |
| Triglycerides (50 mg/dL)           | 1.4 (1.1 - 1.8)      | 0.0034*         | 1.1 (0.6 - 2.1)     | 0.8072          | 0.8 (0.4 - 1.6)       | 0.4603          |
| HDL Cholesterol 10 (mg/dL)         | 0.6 (0.4 - 0.8)      | 0.0004*         | 1.0 (0.6 - 1.5)     | 0.8346          | 1.7 (1.1 - 2.7)       | 0.0179          |
| AST (10 units/L)                   | 1.4 (1.1 - 1.9)      | 0.0139          | 1.4 (1.0 - 2.0)     | 0.0262          | 1.0 (0.8 - 1.2)       | 0.9713          |
| ALT (10 units/L)                   | 1.5 (1.2 - 1.9)      | 0.0004*         | 1.4 (1.1 - 1.7)     | 0.0030*         | 0.9 (0.8 - 1.1)       | 0.2370          |
| AST/ALT Ratio                      | 0.5 (0.1 - 3.5)      | 0.4609          | 1.5 (0.5 - 4.7)     | 0.4969          | 3.2 (0.3 - 29.2)      | 0.3061          |
| Obese <sup>f</sup>                 | 3.1 (1.7 - 5.5)      | 0.0001*         | 1.1 (0.4 - 2.9)     | 0.7951          | 0.4 (0.1 - 1.0)       | 0.0497          |
| Waist Circumference (10 cm)        | 1.6 (1.3 - 2.1)      | 0.0002*         | 0.8 (0.6 - 1.1)     | 0.2506          | 0.5 (0.3 - 0.7)       | 0.0005*         |
| Platelets (50×10 <sup>3</sup> /μL) | 1.1 (0.8 - 1.4)      | 0.5597          | 0.7 (0.5 - 1.0)     | 0.0537          | 0.6 (0.5 - 0.9)       | 0.0120          |
| Anti-HCV                           | 8.4 (0.9 - 79.3)     | 0.0646          | 22.6 (2.2 - 236)    | 0.0091          | 2.7 (0.5 - 14.1)      | 0.2349          |
| Drinks per week                    | 1.1 (0.9 - 1.1)      | 0.7294          | 1.1 (1.0 - 1.2)     | 0.0617          | 1.1 (1.0 - 1.1)       | 0.0898          |
| Heavy Drinking <sup>g</sup>        | 0.7 (0.1 - 7.6)      | 0.7915          | 6.7 (0.7 - 67.9)    | 0.1073          | 9.2 (1.1 - 74.4)      | 0.0377          |

**Abbreviations:** OR, Odds Ratio; CI, confidence interval; HOMA-IR, homeostasis model of insulin resistance; BP, blood pressure; LDL, low-density lipoprotein; HDL, high-density lipoprotein; AST, aspartate aminotransferase; ALT, alanine aminotransferase

**Note.** Statistical tests significant at the 5% level after correction for false discovery rate are marked with an asterisk.

<sup>a</sup> Healthy indicates no evidence of steatosis and liver stiffness  $\leq 1.34$  m/s; steatosis indicates evidence of steatosis and liver stiffness  $\leq 1.34$  m/s; fibrosis indicates liver stiffness  $> 1.34$  m/s

<sup>b</sup> OR, 95% CI and *P*-value obtained from survey-based multinomial logistic regression

<sup>c</sup> According to American Diabetes 2010 Diagnostic Guidelines

<sup>d</sup> Blood pressure analyses are adjusted for self-reported use of antihypertensive medication

<sup>e</sup> Systolic Blood Pressure  $> 135$  or Diastolic Blood Pressure  $> 85$  or taking antihypertensive medication

<sup>f</sup> Body Mass Index  $\geq 30$  kg/m<sup>2</sup>

<sup>g</sup> For men, greater than 21 self-reported drinks per week; for women, greater than 14 drinks per week.

**Supplementary Table 4.** Univariable binomial regression of sociodemographic and clinical parameters with significant liver fibrosis, Cameron County Hispanic Cohort

|                                    | Significant Fibrosis <sup>a</sup> |         |
|------------------------------------|-----------------------------------|---------|
|                                    | OR <sup>b</sup> (95% CI)          | p-value |
| Age (years)                        | 0.8 (0.6 – 1.0)                   | 0.0247  |
| Male Sex                           | 1.8 (0.9 - 3.6)                   | 0.1259  |
| Diabetes <sup>c</sup>              | 0.9 (0.4 - 2.1)                   | 0.8684  |
| Fasting Glucose (10 mg/dL)         | 1.0 (0.9 - 1.1)                   | 0.9908  |
| Hemoglobin A1c (%)                 | 1.0 (0.9 - 1.1)                   | 0.7715  |
| Insulin (10 mg/dL)                 | 0.8 (0.4 - 1.5)                   | 0.5531  |
| HOMA-IR                            | 0.9 (0.8 - 1.2)                   | 0.5397  |
| Diastolic BP (mmHg) <sup>d</sup>   | 1.0 (0.5 - 1.9)                   | 0.9387  |
| Hypertension <sup>e</sup>          | 0.9 (0.4 - 2.3)                   | 0.8584  |
| Triglycerides (50 mg/dL)           | 0.9 (0.6 - 1.6)                   | 0.7864  |
| HDL Cholesterol 10 (mg/dL)         | 1.1 (0.7 - 1.5)                   | 0.7479  |
| AST (10 units/L)                   | 1.1 (1.0 - 1.3)                   | 0.0524  |
| ALT (10 units/L)                   | 1.1 (1.0 - 1.2)                   | 0.3253  |
| AST/ALT Ratio                      | 2.7 (0.8 - 8.6)                   | 0.1017  |
| Obese <sup>f</sup>                 | 0.9 (0.4 - 1.8)                   | 0.7375  |
| Waist Circumference (10 cm)        | 0.9 (0.6 - 1.2)                   | 0.3421  |
| Platelets (50×10 <sup>3</sup> /μL) | 0.8 (0.6 – 1.0)                   | 0.0463  |
| Anti-HCV                           | 5.3 (1.1 - 24.8)                  | 0.0359  |
| Drinks per week                    | 1.1 (1.0 - 1.1)                   | 0.0145  |
| Heavy Drinking <sup>g</sup>        | 3.2 (0.8 - 13.5)                  | 0.1066  |

**Abbreviations:** OR, Odds Ratio; CI, confidence interval; HOMA-IR, homeostasis model of insulin resistance ; BP, blood pressure; LDL, low-density lipoprotein; HDL, high-density lipoprotein; AST, aspartate aminotransferase; ALT, alanine aminotransferase

**Note.** Statistical tests significant at the 5% level after correction for false discovery rate are marked with an asterisk.

<sup>a</sup> Significant fibrosis indicates shear-wave velocity greater than 1.34 m/s

<sup>b</sup> OR, 95% CI and *P*-value obtained from survey-based binomial logistic regression

<sup>c</sup> According to American Diabetes 2010 Diagnostic Guidelines

<sup>d</sup> Blood pressure analyses are adjusted for self-reported use of antihypertensive medication

<sup>e</sup> Systolic Blood Pressure > 135 or Diastolic Blood Pressure > 85 or taking antihypertensive medication

<sup>f</sup> Body Mass Index ≥ 30 kg/m<sup>2</sup>

<sup>g</sup> For men, greater than 21 self-reported drinks per week; for women, greater than 14 drinks per week.

**Supplementary Table 5.** Multiple multinomial logistic regression associations of clinical parameters with healthy liver, steatosis, and liver fibrosis, Cameron County Hispanic Cohort.

|                                    | Steatosis vs Healthy <sup>a</sup> |         | Fibrosis vs Healthy |         | Fibrosis vs Steatosis |         |
|------------------------------------|-----------------------------------|---------|---------------------|---------|-----------------------|---------|
|                                    | OR (95% CI) <sup>b</sup>          | p-value | OR (95% CI)         | p-value | OR (95% CI)           | p-value |
| Age (years)                        | 1.0 (1.0 - 1.0)                   | 0.9096  | 1.0 (0.9 - 1.0)     | 0.0545  | 1.0 (0.9 - 1.0)       | 0.0636  |
| Male Sex                           | 0.6 (0.2 - 1.9)                   | 0.4003  | 1.3 (0.5 - 3.5)     | 0.5832  | 2.1 (0.6 - 7.2)       | 0.2365  |
| Fasting Glucose (10 mg/dL)         | 1.0 (1.0 - 1.1)                   | 0.3476  | 1.1 (1.0 - 1.2)     | 0.1157  | 1.1 (0.9 - 1.2)       | 0.3471  |
| Triglycerides (50 mg/dL)           | 1.3 (1.0 - 1.7)                   | 0.0327  | 1.1 (0.7 - 1.6)     | 0.7811  | 0.8 (0.5 - 1.2)       | 0.2496  |
| AST (10 u/L)                       | 0.8 (0.5 - 1.5)                   | 0.5233  | 1.6 (0.6 - 4.0)     | 0.3150  | 1.9 (0.8 - 4.4)       | 0.1187  |
| ALT (10 u/L)                       | 1.5 (1.0 - 2.2)                   | 0.0278  | 0.9 (0.6 - 1.5)     | 0.7123  | 0.6 (0.4 - 0.9)       | 0.0231  |
| Waist Circumference (10 cm)        | 1.4 (1.1 - 1.8)                   | 0.0129  | 1.2 (0.8 - 1.8)     | 0.4066  | 0.9 (0.6 - 1.4)       | 0.5584  |
| Platelets (50×10 <sup>3</sup> /μL) | 1.2 (0.9 - 1.6)                   | 0.2869  | 0.8 (0.6 - 1.2)     | 0.2989  | 0.7 (0.5 - 1.0)       | 0.0519  |
| Anti-HCV                           | 9.1 (0.6 - 139.5)                 | 0.1115  | 19.1 (1.9 - 197.9)  | 0.0132  | 2.1 (0.2 - 26.0)      | 0.5652  |
| Drinks per week                    | 1.0 (0.9 - 1.1)                   | 0.6776  | 1.1 (1.0 - 1.2)     | 0.2251  | 1.1 (1.0 - 1.2)       | 0.1003  |

**Abbreviations:** OR, Odds Ratio; CI, confidence interval; AST, aspartate aminotransferase; ALT, alanine aminotransferase; HCV, hepatitis C Virus

<sup>a</sup> Healthy indicates no evidence of steatosis and liver stiffness  $\leq 1.34$ ; steatosis indicates evidence of steatosis and liver stiffness  $\leq 1.34$  m/s; fibrosis indicates liver stiffness  $> 1.34$  m/s

<sup>b</sup> OR, 95% CI and *P*-value obtained from survey-based multinomial logistic regression

Figure S1. Recruitment Flow Chart

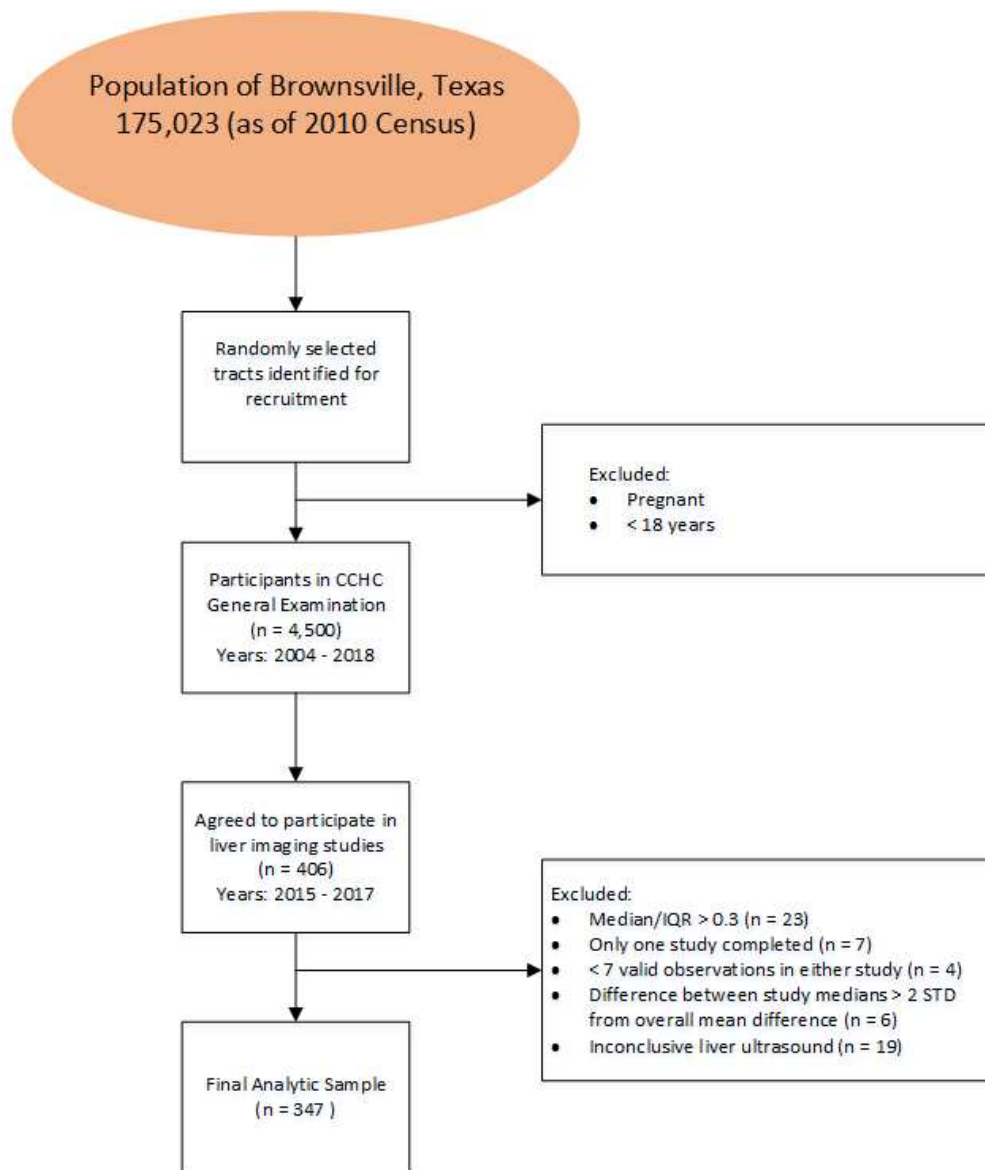

**EDITOR'S NOTES****Background**

The burden of hepatocellular carcinoma is increasing among Mexican American Hispanics, but little is known about the burden and distribution of liver fibrosis in the population.

**Findings**

Using point shear-wave elastography in a Mexican American cohort in south Texas, we found a population prevalence of significant liver fibrosis equal to 13.8%, overwhelmingly attributable to non-viral, non-alcoholic disease.

**Implications for Patient Care**

The use of elastographic imaging is an important and practical method for screening and risk stratification to reduce the burden of hepatocellular carcinoma among Mexican Americans.
